# Supplementary material for: Exosomal hsa_circ_0004658 derived from RBPJ overexpressed-macrophages inhibits hepatocellular carcinoma progression via miR-499b-5p/JAM3
Source: PubMed Central journal article supplement (PMC8748962; doi:10.1038/s41419-021-04345-9), 2022-01-10
Supplement: 41419_2021_4345_MOESM2_ESM.pdf [file 41419_2021_4345_MOESM2_ESM.pdf]

Please complete the table below to indicate the contributions of all named authors to the figures.

Figure 1:

|  |
|--|
|  |
|--|

Figure 2:

|  |
|--|
|  |
|--|

Figure 3:

|  |
|--|
|  |
|--|

Figure 4:

|  |
|--|
|  |
|--|

Figure 5:

|  |
|--|
|  |
|--|

Figure 6:

|  |
|--|
|  |
|--|

Signed for and on behalf of the Author(s):

*Huilong Wu*

Print Name:

|  |
|--|
|  |
|--|

Date:

|  |
|--|
|  |
|--|
